# Supplementary material
Source: MDPI journal article supplement (https://www.mdpi.com/2079-6412/11/9/1041)
Supplement: s1 [file s1]

# Supplementary Materials: Theoretical Analysis of Si<sub>2</sub>H<sub>6</sub> Adsorption on Hydrogenated Silicon Surfaces for Fast Deposition Using Intermediate Pressure SiH<sub>4</sub> Capacitively Coupled Plasma

Hwanyeol Park <sup>1</sup> and Ho Jun Kim <sup>2,\*</sup>

<sup>1</sup> Memory Thin Film Technology Team, Giheung Hwaseong Complex, Samsung Electronics, Hwasung 445-701, Korea; phy3654.park@samsung.com

<sup>2</sup> Department of Mechanical Engineering, Gachon University, 1342, Seongnam-daero, Sujeong-gu, Seongnam-si, Gyeonggi-do 13120, Korea

\* Correspondence: hojunkim@gachon.ac.kr or tiger.anima@gmail.com

This supporting information provides details of the structures of the adsorption, transition, and reaction states of Si<sub>2</sub>H<sub>6</sub> on H-50% covered Si(001) and Si(111) surfaces.

## 1. H-50% covered Si(001) and H-50% covered Si(111) surfaces

The adsorption energies of Si<sub>2</sub>H<sub>6</sub> were calculated on two different Si surfaces for each geometry and position, and are summarized in Tables S1–S2.

## 2. Optimized structures

Figures S1–S4 show the optimized structures for specific reaction states, such as at the initial, transition, and final step for the decomposition of Si<sub>2</sub>H<sub>6</sub> on the H-50% covered Si(001) and Si(111) surfaces. The energies of both the initial and final states of the Si, H, and Si<sub>x</sub>H<sub>y</sub> species remaining at the most stable sites on these surfaces were calculated for each geometry and at each position. Tables S3–S6 indicate the activation energies and reaction energies for the overall reactions of the Si<sub>2</sub>H<sub>6</sub> decomposition on the above-mentioned two Si surfaces. These tables provide information on whether the Si<sub>x</sub>H<sub>y</sub> reaction is energetically stable or unstable for each reaction step.

**Table S1.** Adsorption energies of Si<sub>2</sub>H<sub>6</sub> on the H-50% covered Si(001)-(4 × 4) surface, calculated for each geometry and position.

| Geometry | Position | E <sub>ads</sub> (eV) |
|----------|----------|-----------------------|
| 1        | 1        | -0.35464              |
| 1        | 2        | -0.35663              |
| 1        | 3        | -0.34548              |
| 1        | 4        | -0.25754              |
| <b>1</b> | <b>5</b> | <b>-0.39696</b>       |
| 1        | 6        | -0.34459              |
| 1        | 7        | -0.27298              |
| 1        | 8        | -0.32587              |
| 1        | 9        | -0.25409              |
| 1        | 10       | -0.24295              |
| 2        | 1        | -0.19820              |
| 2        | 2        | -0.22156              |
| 2        | 3        | -0.24548              |
| 2        | 4        | -0.20697              |
| 2        | 5        | -0.17435              |
| 2        | 6        | -0.27282              |
| 2        | 7        | -0.15625              |
| 2        | 8        | -0.20436              |
| 2        | 9        | -0.20208              |
| 2        | 10       | -0.18826              |

**Table S2.** Adsorption energies of Si<sub>2</sub>H<sub>6</sub> on the H-50% covered Si(111)-(4 × 4) surface, calculated for each geometry and position.

| Geometry | Position | E <sub>ads</sub> (eV) |
|----------|----------|-----------------------|
| 1        | 1        | -0.26245              |
| <b>1</b> | <b>2</b> | <b>-0.28634</b>       |
| 1        | 3        | -0.26425              |
| 1        | 4        | -0.25195              |
| 1        | 5        | -0.21753              |
| 1        | 6        | -0.23793              |
| 2        | 1        | -0.24621              |
| 2        | 2        | -0.20771              |
| 2        | 3        | -0.27621              |
| 2        | 4        | -0.22102              |
| 2        | 5        | -0.22715              |
| 2        | 6        | -0.21653              |

2<sup>nd</sup> reaction step : Si-H bond dissociation

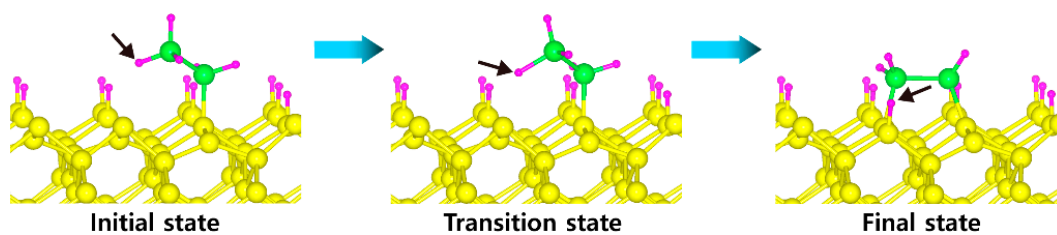

**3<sup>rd</sup> reaction step : Si-H bond dissociation**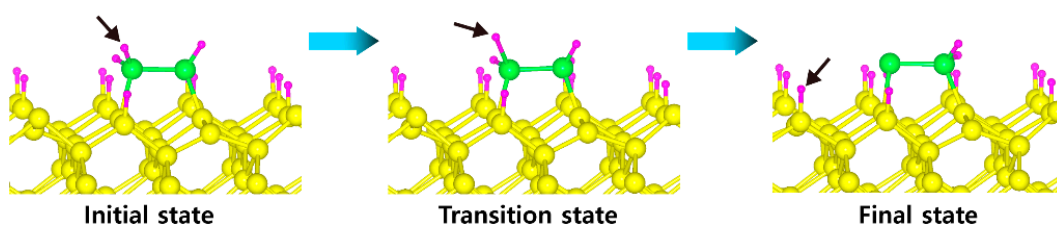**4<sup>th</sup> reaction step : Si-H bond dissociation**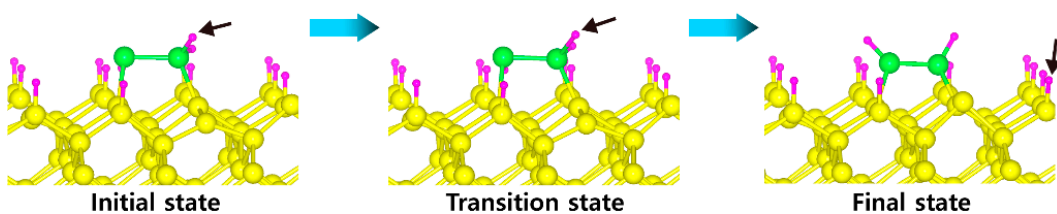**5<sup>th</sup> reaction step : Si-H bond dissociation**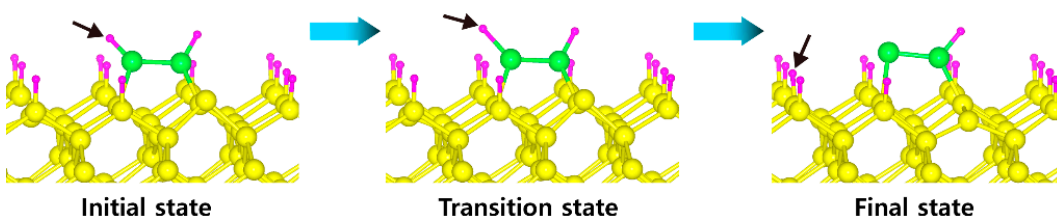**6<sup>th</sup> reaction step : Si-H bond dissociation**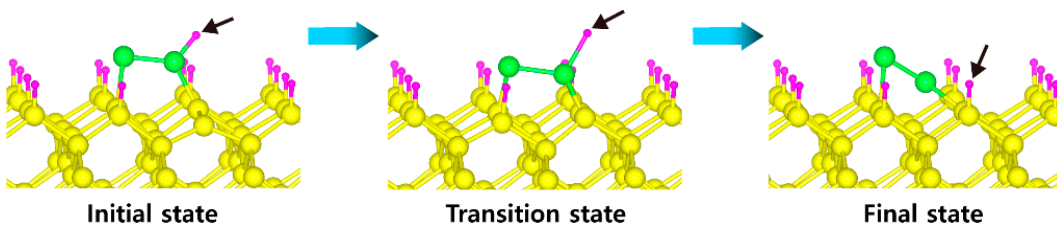

**7<sup>th</sup> reaction step : Si-Si bond dissociation**

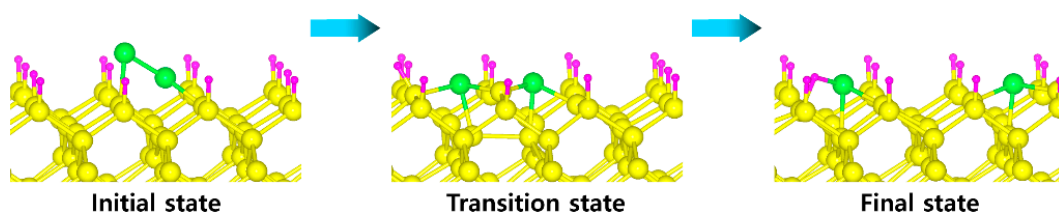

**8<sup>th</sup> reaction step : Si-H bond dissociation**

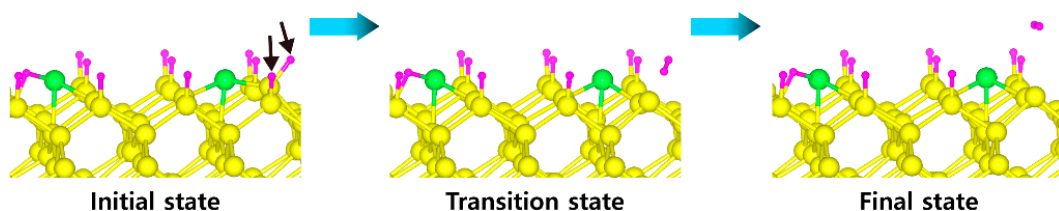

**Figure S1.** Initial (IS), transition (TS), and final (FS) states of intermediate reactions of Si<sub>2</sub>H<sub>6</sub> from the 2<sup>nd</sup> reaction step to the 8<sup>th</sup> reaction step for path a on the H-50% covered Si(001) surface.

**Table S3.** Activation energies ( $E_a$ , eV) and reaction energies ( $E_{rxn}$ , eV) of Si<sub>2</sub>H<sub>6</sub> dissociation for path a on the H-50% covered Si(001) surface.

| Reaction step | Bond dissociation | $E_a$ (eV) | $E_{rxn}$ (eV) |
|---------------|-------------------|------------|----------------|
| Step 1        | Si-H              | 0.15       | -2.04          |
| Step 2        | Si-H              | 0.64       | -1.97          |
| Step 3        | Si-H              | 1.51       | 0.57           |
| Step 4        | Si-H              | 0.99       | -1.48          |
| Step 5        | Si-H              | 1.63       | 0.43           |
| Step 6        | Si-H              | 0.22       | -0.09          |
| Step 7        | Si-Si             | 1.22       | 0.93           |
| Step 8        | Si-H              | 0.83       | 0.78           |

**3<sup>rd</sup> reaction step : Si-Si bond dissociation**

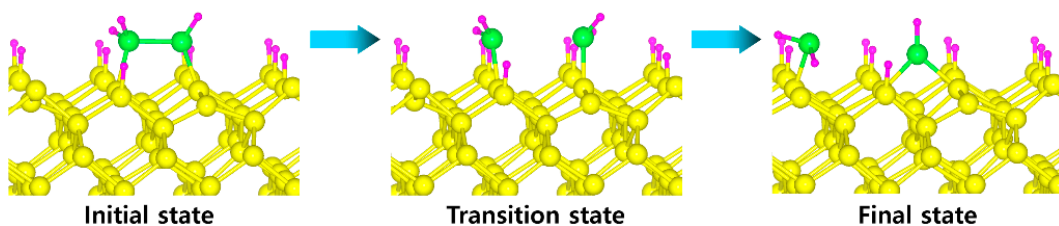

4<sup>th</sup> reaction step : Si-H bond dissociation

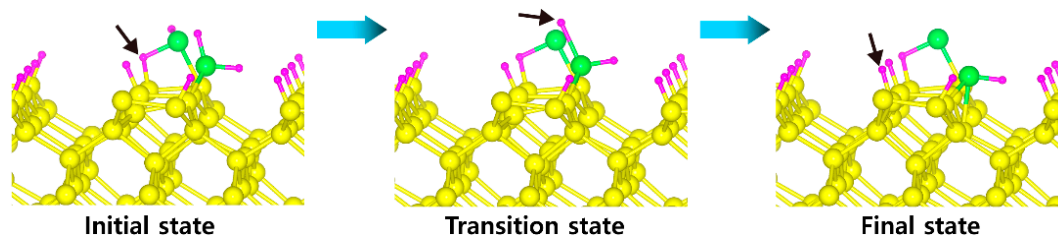

5<sup>th</sup> reaction step : Si-H bond dissociation

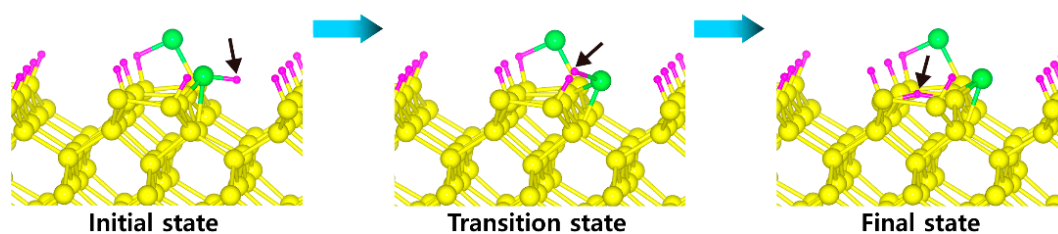

6<sup>th</sup> reaction step : Si-H bond dissociation

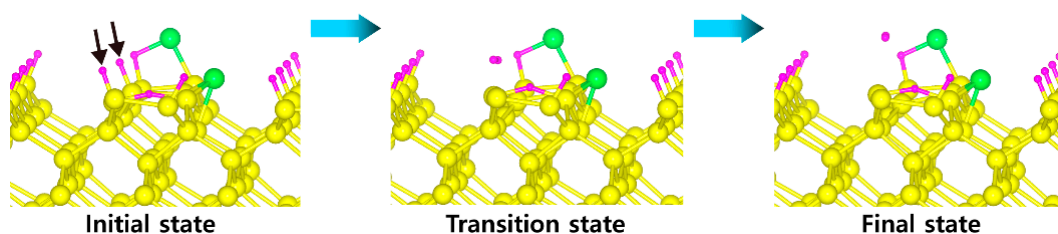

**Figure S2.** Initial (IS), transition (TS), and final (FS) states of intermediate reactions of Si<sub>2</sub>H<sub>6</sub> from the 3<sup>rd</sup> reaction step to the 6<sup>th</sup> reaction step for path b on the H-50% covered Si(001) surface.

**Table S4.** Activation energies ( $E_a$ , eV) and reaction energies ( $E_{rxn}$ , eV) of Si<sub>2</sub>H<sub>6</sub> dissociation for path b on the H-50% covered Si(001) surface.

| Reaction step | Bond dissociation | $E_a$ (eV) | $E_{rxn}$ (eV) |
|---------------|-------------------|------------|----------------|
| Step 3        | Si-Si             | 2.52       | 0.69           |
| Step 4        | Si-H              | 1.15       | -0.35          |
| Step 5        | Si-H              | 1.68       | 1.04           |
| Step 6        | Si-H              | 2.20       | 2.02           |

**2<sup>nd</sup> reaction step : Si-H bond dissociation**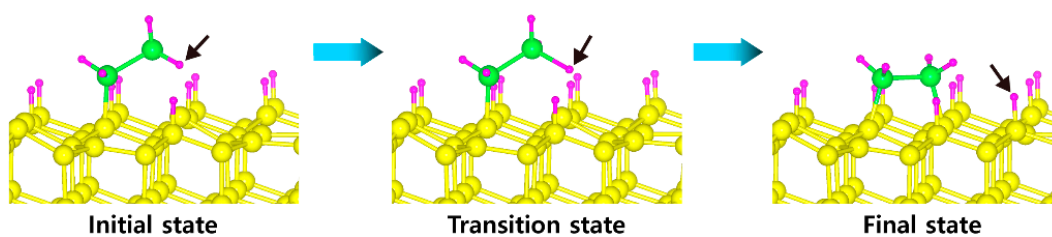**3<sup>rd</sup> reaction step : Si-H bond dissociation**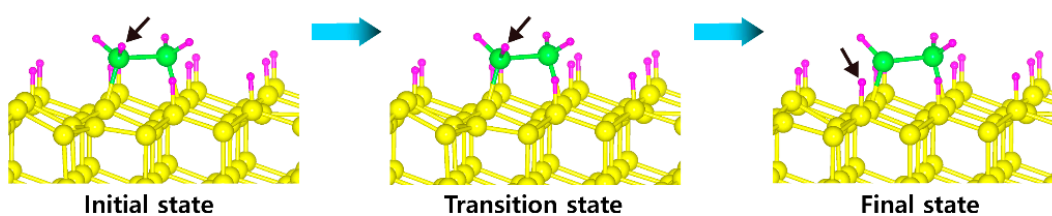**4<sup>th</sup> reaction step : Si-H bond dissociation**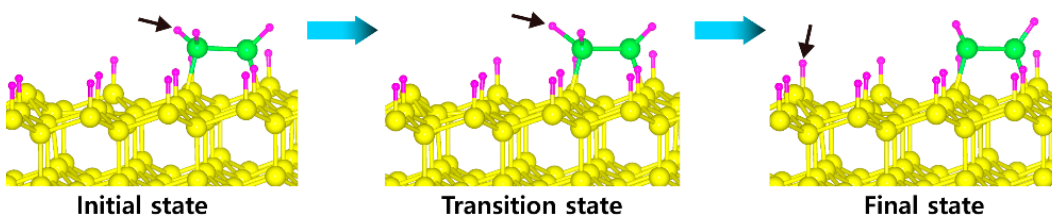**5<sup>th</sup> reaction step : Si-H bond dissociation**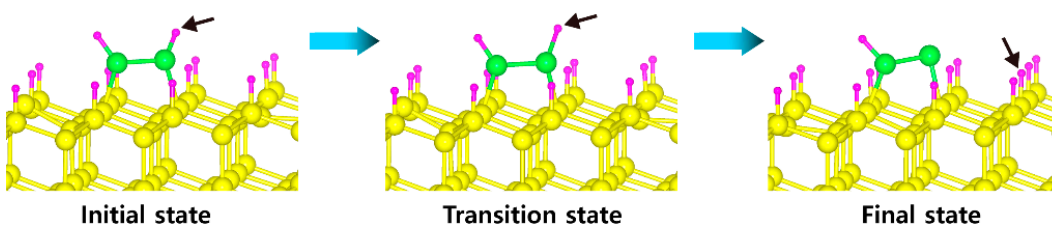

6<sup>th</sup> reaction step : Si-H bond dissociation

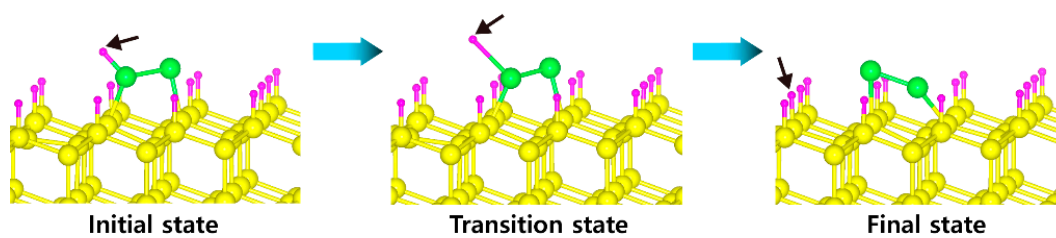

7<sup>th</sup> reaction step : Si-Si bond dissociation

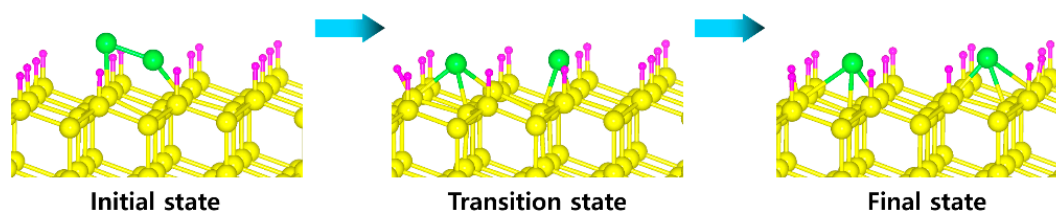

8<sup>th</sup> reaction step : Si-H bond dissociation

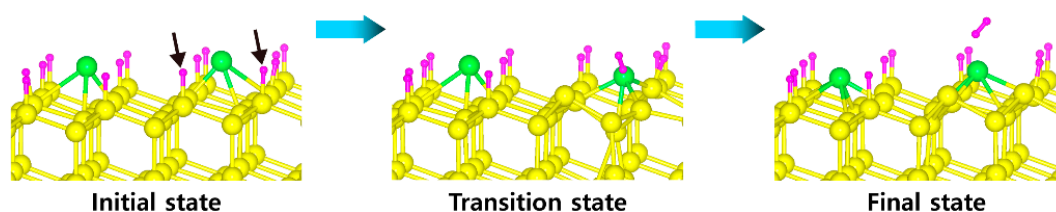

**Figure S3.** Initial (IS), transition (TS), and final (FS) states of intermediate reactions of Si<sub>2</sub>H<sub>6</sub> from the 2<sup>nd</sup> reaction step to the 8<sup>th</sup> reaction step for path a on the H-50% covered Si(111) surface.

**Table S5.** Activation energies ( $E_a$ , eV) and reaction energies ( $E_{rxn}$ , eV) of Si<sub>2</sub>H<sub>6</sub> dissociation for path a on the H-50% covered Si(111) surface.

| Reaction step | Bond dissociation | $E_a$ (eV) | $E_{rxn}$ (eV) |
|---------------|-------------------|------------|----------------|
| Step 1        | Si-H              | 0.22       | -2.60          |
| Step 2        | Si-H              | 1.21       | -2.29          |
| Step 3        | Si-H              | 1.31       | 0.40           |
| Step 4        | Si-H              | 0.94       | -1.38          |
| Step 5        | Si-H              | 1.23       | 0.33           |
| Step 6        | Si-H              | 2.06       | -0.12          |
| Step 7        | Si-Si             | 2.81       | 1.87           |
| Step 8        | Si-H              | 1.47       | 1.18           |



3<sup>rd</sup> reaction step : Si-Si bond dissociation

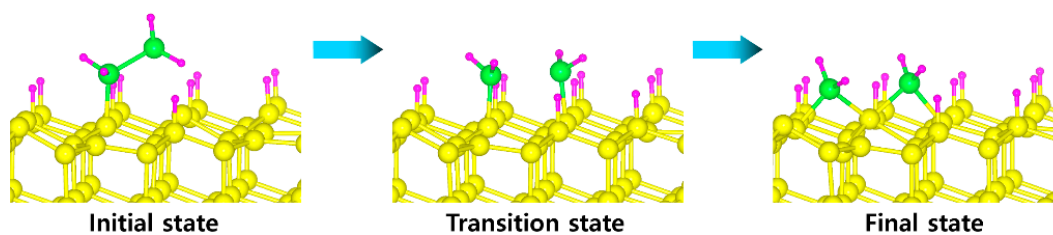

4<sup>th</sup> reaction step : Si-H bond dissociation

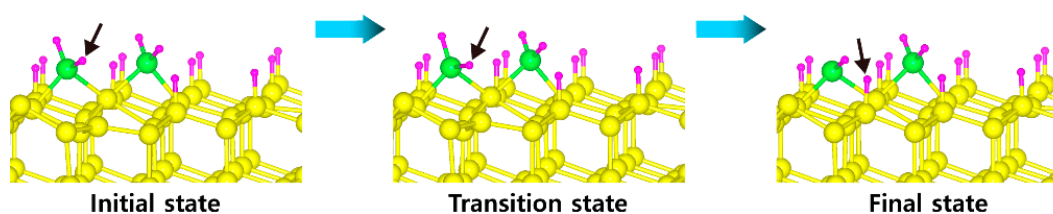

5<sup>th</sup> reaction step : Si-H bond dissociation

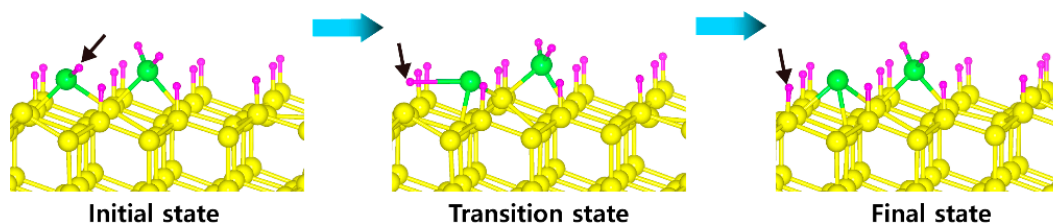

6<sup>th</sup> reaction step : Si-H bond dissociation

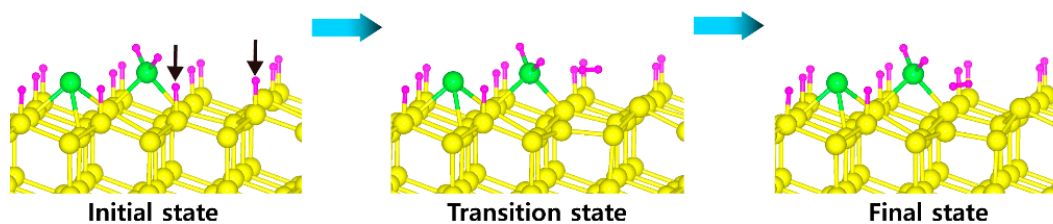

**Figure S4.** Initial (IS), transition (TS), and final (FS) states of intermediate reactions of Si<sub>2</sub>H<sub>6</sub> from the 3<sup>rd</sup> reaction step to the 6<sup>th</sup> reaction step for path b on the H-50% covered Si(111) surface.



**Table S6.** Activation energies ( $E_a$ , eV) and reaction energies ( $E_{\text{rxn}}$ , eV) of  $\text{Si}_2\text{H}_6$  dissociation for path b on the H-50% covered Si(111) surface.

| Reaction step | Bond dissociation | $E_a$ (eV) | $E_{\text{rxn}}$ (eV) |
|---------------|-------------------|------------|-----------------------|
| Step 3        | Si-Si             | 1.57       | 0.94                  |
| Step 4        | Si-H              | 0.39       | -0.52                 |
| Step 5        | Si-H              | 0.43       | -0.40                 |
| Step 6        | Si-H              | 2.54       | -0.29                 |
